# Supplementary material for: Envelope-Specific Recognition Patterns of HIV Vaccine-Induced IgG Antibodies Are Linked to Immunogen Structure and Sequence
Source: PubMed Central journal article supplement (PMC6492543; doi:10.3389/fimmu.2019.00717), 2019-04-24

Phylogenetic Heatmap of V2 peptide variant recognition in TMV01 recipients after MVA#2

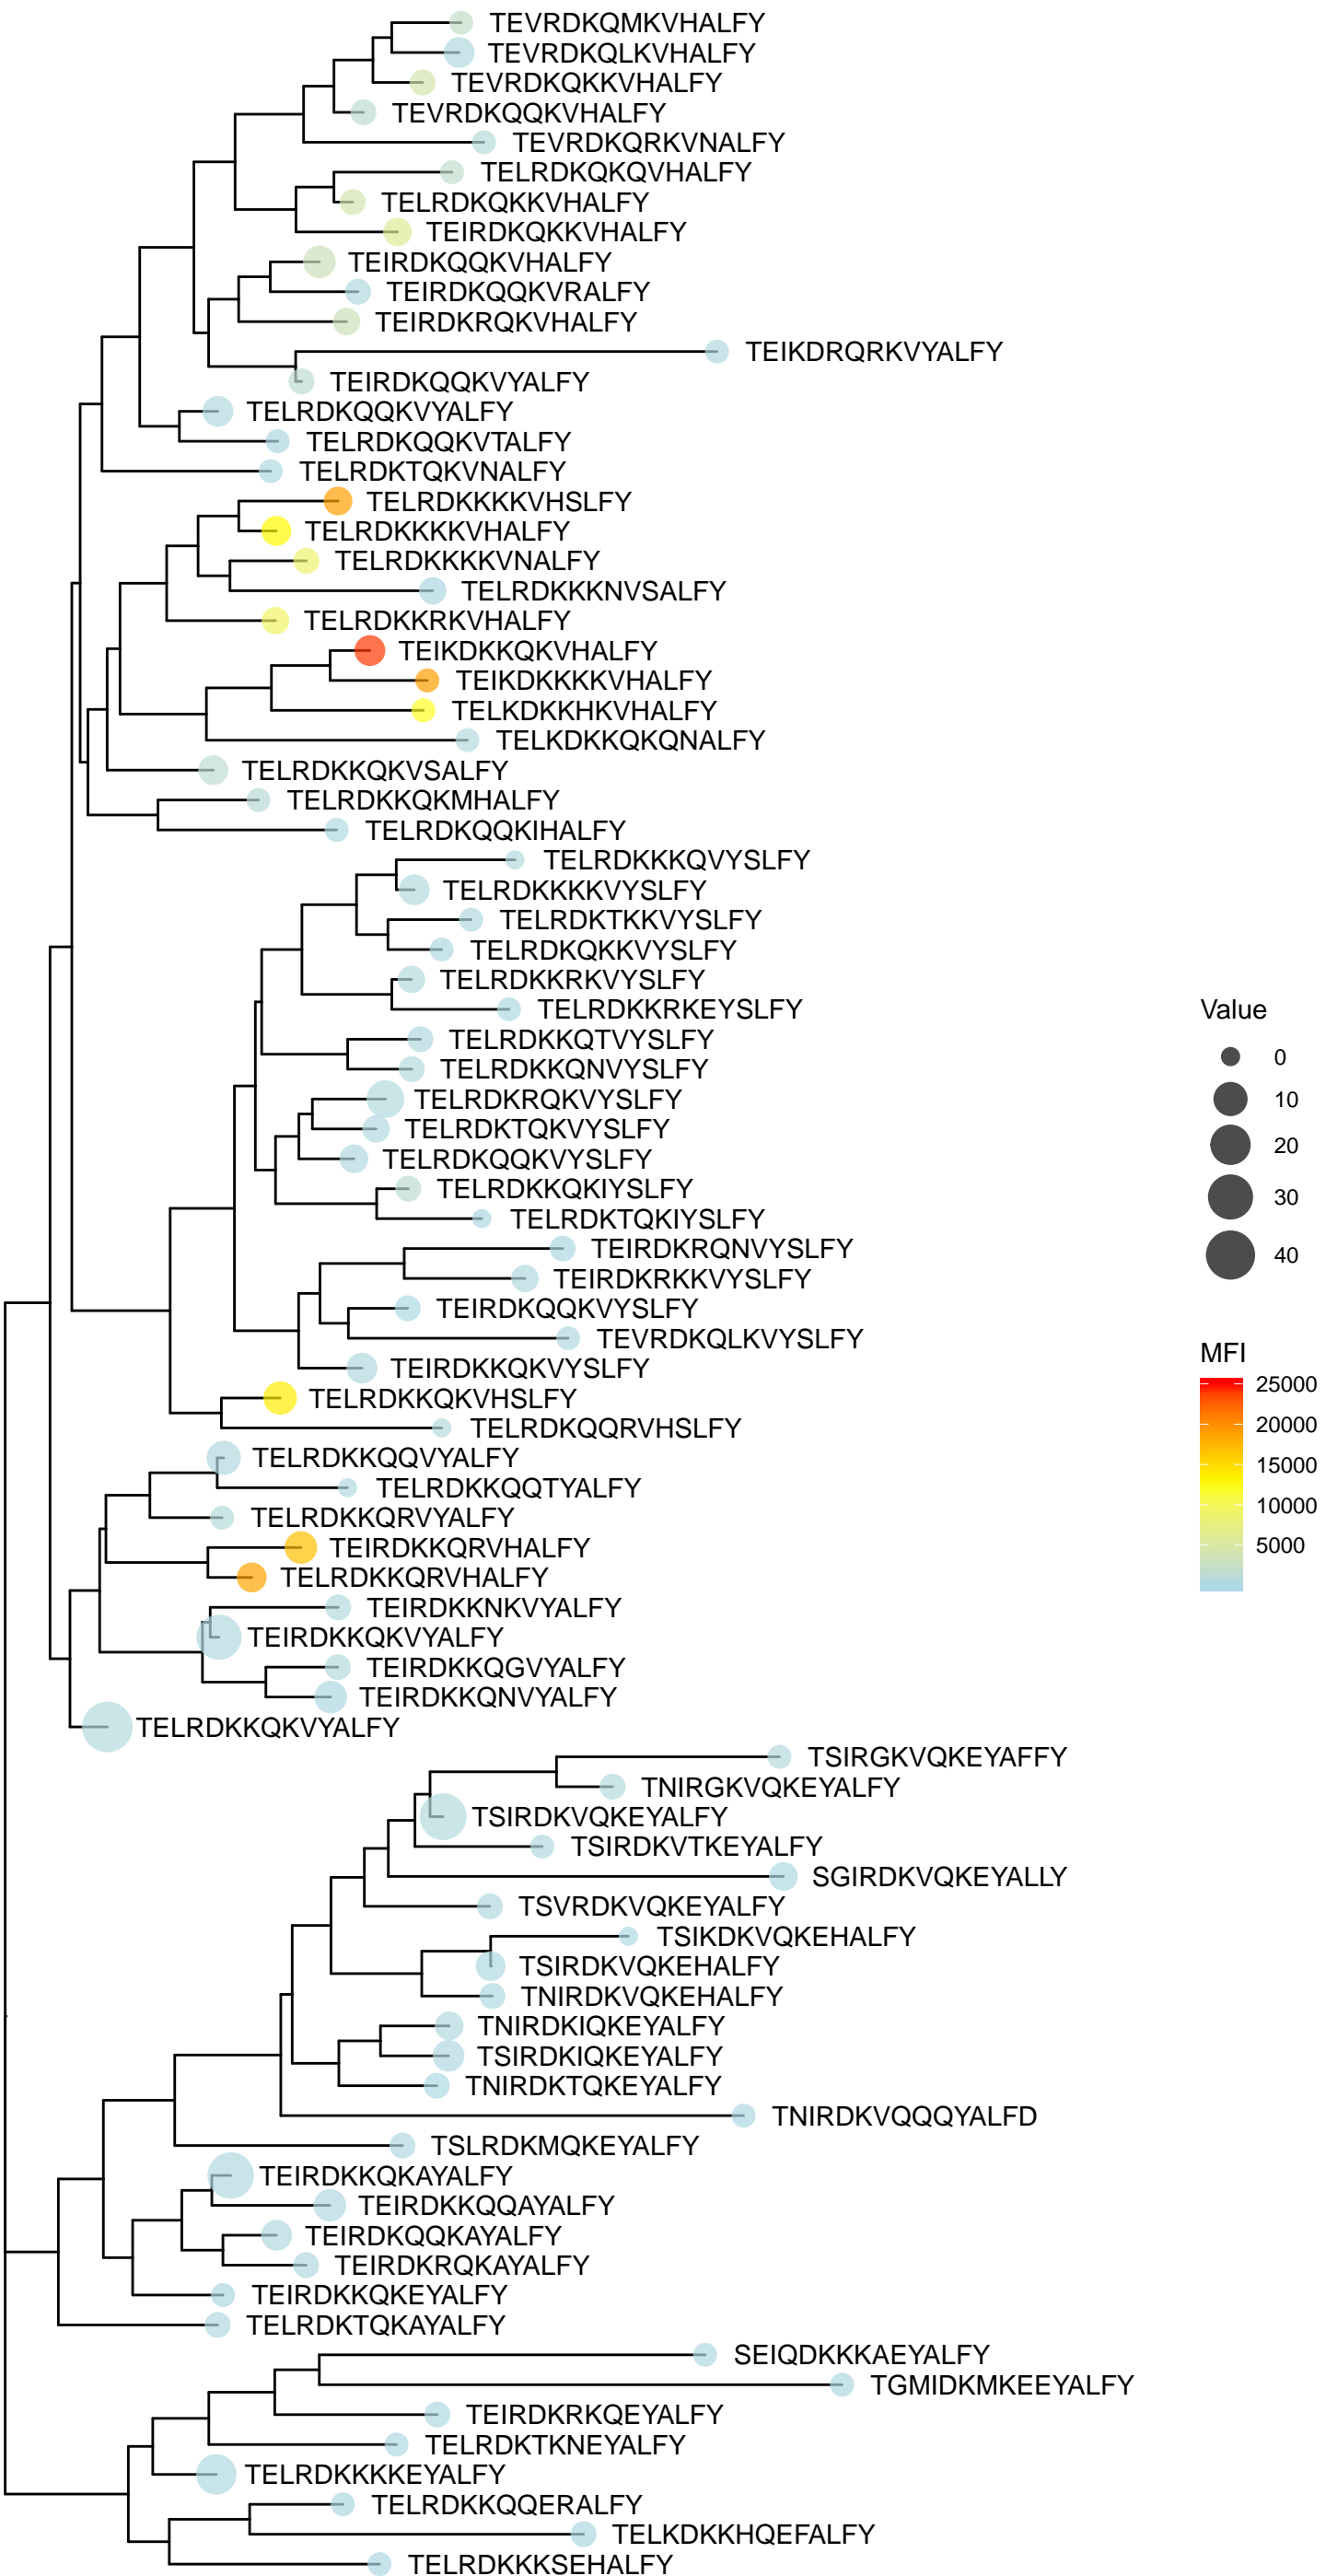

Supplement: Data_Sheet_1.pdf [file Data_Sheet_1.pdf]
