# Supplementary material for: Envelope-Specific Recognition Patterns of HIV Vaccine-Induced IgG Antibodies Are Linked to Immunogen Structure and Sequence
Source: PubMed Central journal article supplement (PMC6492543; doi:10.3389/fimmu.2019.00717), 2019-04-24
Supplement: Table_1.pdf [file Table_1.pdf]

Table S1: Isolates utilised for the peptide array design

| Patient Code (id)               | Accession                | Name                   | Subtype | Country | Sampling Year | Fiebig stage | Patient sex | Patient Health  | Risk Factor        | Coreceptor | Viral Load | Days from Seroconversion |
|---------------------------------|--------------------------|------------------------|---------|---------|---------------|--------------|-------------|-----------------|--------------------|------------|------------|--------------------------|
| <a href="#">R163(38637)</a>     | <a href="#">GU481385</a> | 06_RU_SP_R163_lorII_13 | A6      | RU      | 2006          | 1 or 2       | F           | acute infection | IV Drug User       |            | 316228     | pre-seroconversion       |
| <a href="#">Q842(1121)</a>      | <a href="#">AF407160</a> | Q842-d12_PNS70d        | A1      | KE      | 1994          |              | F           | acute infection | Sex worker         | CCR5       | 271220     | 28                       |
| <a href="#">374(9528)</a>       | <a href="#">AF041133</a> | PIH374                 | B       | FR      | 1995          |              | M           | acute infection | Homosexual         |            |            | 0                        |
| <a href="#">BORI0637(14179)</a> | <a href="#">EU576282</a> | BORId9_2F8             | B       | US      | 1990          | 2            | M           | acute infection | Male Sex with Male | CCR5       | 2400000    | 0                        |
| <a href="#">25925(13781)</a>    | <a href="#">EF117273</a> | HIV_25925_2            | C       | IN      | 1999          | 3            | M           | acute infection | Heterosexual       | CCR5       | 616531     | 45                       |
| <a href="#">0393(30635)</a>     | <a href="#">FJ444215</a> | CHV0011210_0393-C3     | C       | MW      | 2003          | 4            | F           | acute infection | Heterosexual       |            | 12048485   | early                    |
| <a href="#">426(3691)</a>       | <a href="#">AY231158</a> | PHI426                 | 01_AE   | FR      | 1996          |              | M           | acute infection | Heterosexual       |            | 16767      | 30                       |
| <a href="#">127(3688)</a>       | <a href="#">AY231152</a> | PHI127                 | 02_AG   | FR      | 1992          |              | F           | acute infection |                    |            |            | 30                       |
