# Supplementary material for: Envelope-Specific Recognition Patterns of HIV Vaccine-Induced IgG Antibodies Are Linked to Immunogen Structure and Sequence
Source: PubMed Central journal article supplement (PMC6492543; doi:10.3389/fimmu.2019.00717), 2019-04-24
Supplement: Table_2.pdf [file Table_2.pdf]

MFI over all vaccinees

| V3 Variant Sequence | UK003SG     |                | TMV01       |                |
|---------------------|-------------|----------------|-------------|----------------|
|                     | post 2ndMVA | post CN54gp140 | post 2ndMVA | post CN54gp140 |
| RKGIHLGPGQTFYAT     | 24249       | 46742          | 5639        | 26781          |
| RKGIHMGPGRAFYAT     | 834         | 2823           | 1155        | 8111           |
| RKRIRIQRGPGRAFV     | 268         | 627            | 76          | 789            |
| RKSIHIAPGRAFYAT     | 3949        | 11177          | 937         | 6106           |
| RKSIHIGPGKAFYAA     | 34174       | 48823          | 1785        | 22568          |
| RKSIHIGPGQAFYAT     | 39454       | 51943          | 6229        | 32784          |
| RKSIHIGPGQAFYTT     | 42701       | 52636          | 4997        | 29122          |
| RKSIHIGPGRAFYAT     | 120         | 168            | 216         | 293            |
| RKSIHIGPGRAFYTT     | 20559       | 41641          | 1599        | 16351          |
| RKSIHMGPGKAFYAT     | 1620        | 6872           | 1548        | 10114          |
| RKSINIGPGRAFYAT     | 46028       | 52331          | 2661        | 34311          |
| RKSINIGPGRAFYTT     | 40755       | 48250          | 3584        | 34981          |
| RKSINIGPGRALYTT     | 45270       | 48566          | 529         | 27456          |
| RKSIPIGPGRAFYAT     | 3973        | 18038          | 7999        | 28583          |
| RKSIPIGPGRAFYTT     | 3204        | 14766          | 8108        | 27843          |
| RKSIRIGPGQAFFAT     | 48692       | 54605          | 2695        | 35319          |
| RKSIRIGPGQAFYAT     | 48698       | 54162          | 4352        | 36563          |
| RKSIRIGPGQAFYTT     | 39648       | 53203          | 1524        | 22505          |
| RKSIRIGPGQSFYAT     | 51757       | 53128          | 5265        | 49289          |
| RKSIRIGPGQTFYAT     | 50904       | 52656          | 6470        | 53469          |
| RKSIRIGPGQVFYAT     | 37535       | 49290          | 798         | 12490          |
| RKSIRIGPGSTFYAT     | 47800       | 54793          | 359         | 20930          |
| RKSIISIGPGRAFYAT    | 41215       | 53121          | 3609        | 36920          |
| RKSMRIGPGQTFYAT     | 8248        | 28908          | 5491        | 28466          |
| RKSVHIGPGQAFYAT     | 723         | 6551           | 574         | 10077          |
| RKSVRIGPGQAFYAM     | 41914       | 50533          | 7990        | 35545          |
| RKSVRIGPGQAFYAT     | 32752       | 50480          | 4489        | 27422          |
| RKSVRIGPGQTFYAT     | 50539       | 54490          | 4638        | 39986          |
| RQSIRIGPGQTFYAT     | 95          | 1241           | 129         | 272            |
| RQSTHIGPGQALYTT     | 55          | 345            | 62          | 901            |
| RRSIHIGPGRAFYAT     | 2058        | 7572           | 883         | 6930           |
| RRSINIGPGRAFYAT     | 10697       | 31353          | 2051        | 17467          |
| RRSIRFGPGQAFYAT     | 4997        | 21575          | 2210        | 8746           |
| RRSIRIGPGQTFYAT     | 48769       | 53735          | 2591        | 35544          |
| RRSVRIGPGQTFYAT     | 27956       | 51420          | 2618        | 24331          |
| RTSMRIGPGQVFYRT     | 2212        | 10509          | 2950        | 12870          |

**Supplementary Table 2.** Numeric data of Mean Fluorescence Intensity (MFI) values for the IgG recognition of HIV Envelope variable region 3 peptide variants as shown in the phylogenetic heat map of Figure 7.
